# Supplementary material for: Dy3+doped (K,Na)NbO3-based multifunctional ceramics for achieving enhanced temperature-stable piezoelectricity and non-contact optical temperature sensing performance
Source: Royal Society of Chemistry journal article supplement (doi:10.1039/d3qi00205e), 2023-01-01
Supplement: d3qi00205e1.pdf [file d3qi00205e1.pdf]

## Supporting Information

**Dy<sup>3+</sup> doped (K,Na)NbO<sub>3</sub>-based multifunctional ceramics for achieving enhanced temperature-stable piezoelectricity and non-contact optical temperature sensing performance**

*Qing Liu<sup>1</sup> †\*, Er Pan<sup>1</sup> †, Hao Deng<sup>1</sup>, Fucui Liu<sup>1</sup>\* and Jing-Feng Li<sup>2</sup>*

<sup>1</sup>School of Optoelectronic Science and Engineering & State Key Laboratory of Electronic Thin Films and Integrated Devices, University of Electronic Science and Technology of China, Chengdu 611731, China

† These authors contributed equally to this work.

\*Corresponding Author: [liuqing19@uestc.edu.cn](mailto:liuqing19@uestc.edu.cn); [fucailiu@uestc.edu.cn](mailto:fucailiu@uestc.edu.cn)

<sup>2</sup> State Key Laboratory of New Ceramics and Fine Processing, School of Materials Science and Engineering, Tsinghua University, Beijing, 100084, China

Keywords : Piezoelectric; Thermal stability; Rare earth; Lead-free; KNN

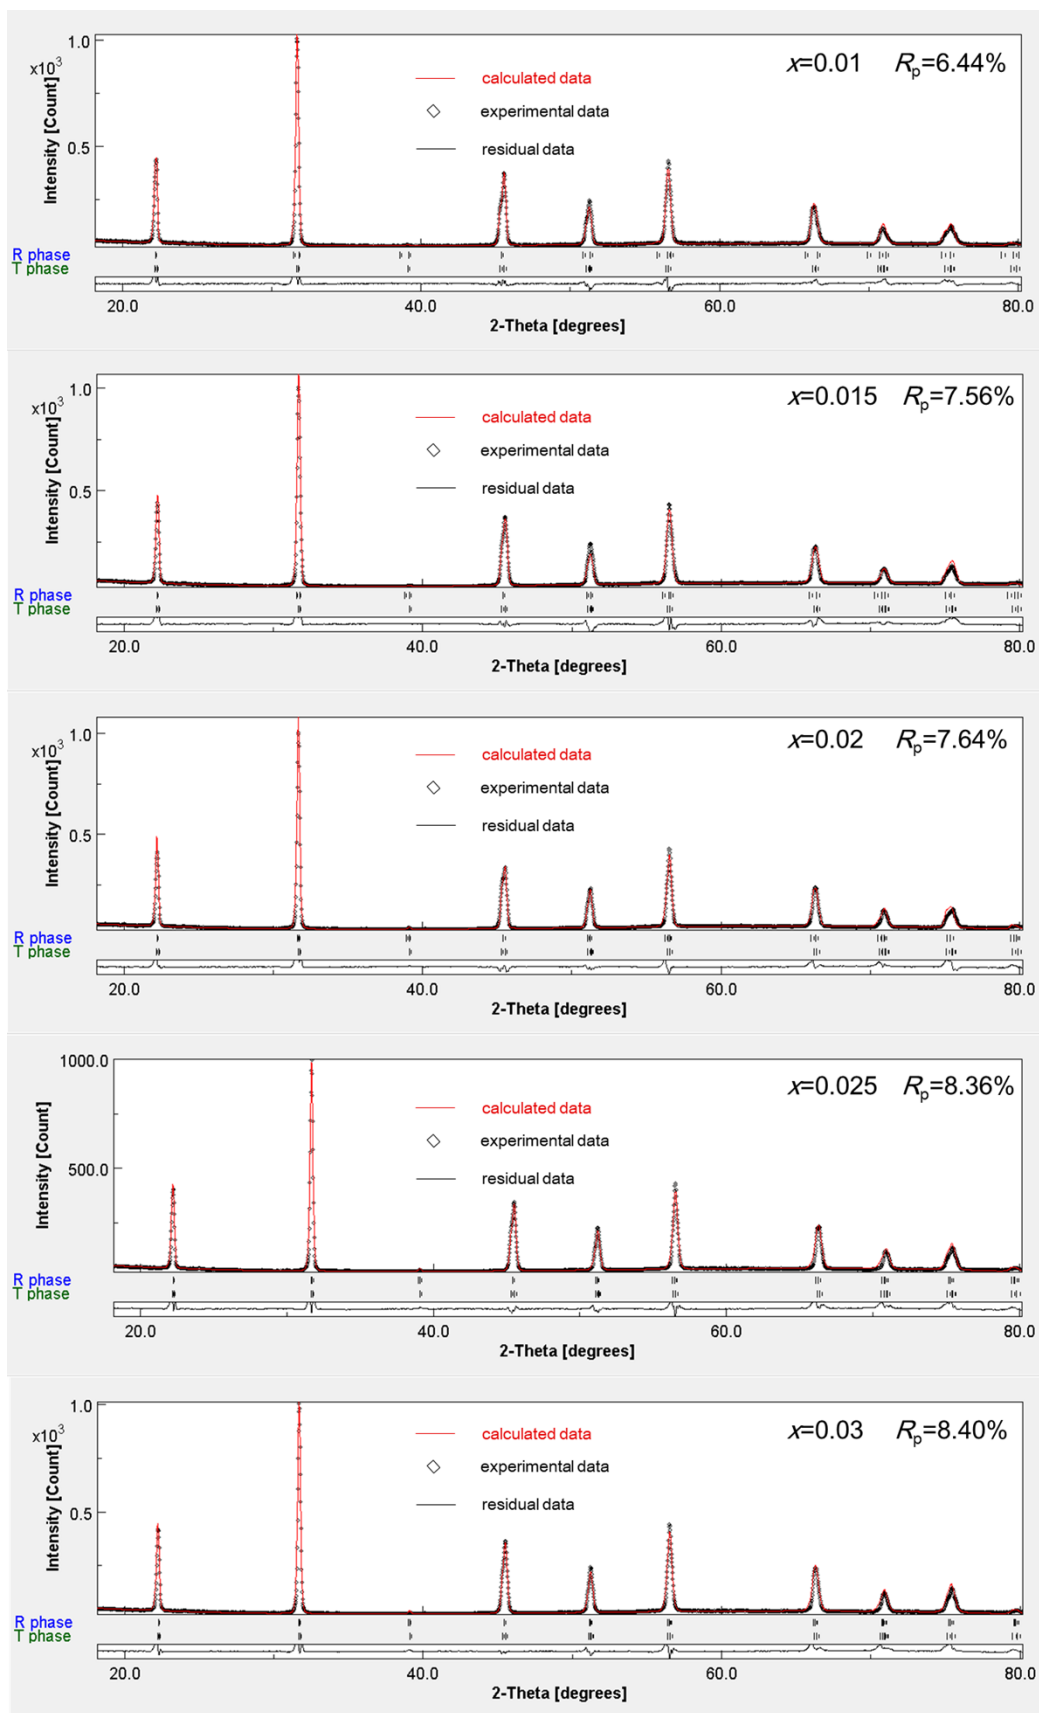

Figure S1. Rietveld refinements of the XRD patterns for LKNNS-BZ- $x$ DyNZ ceramics.

**Table R1** The results of the Rietveld refinement of XRD patterns for LKNNS-BZ- $x$ DyNZ ceramics

| Composition | Symmetry | Proportion (%) | Space group | a(Å)   | b(Å)   | c(Å)   | $\alpha$ (°) | $R_p$ (%) |
|-------------|----------|----------------|-------------|--------|--------|--------|--------------|-----------|
| $x=0.01$    | R        | 10.9           | R3m         | 3.9941 | 3.9941 | 3.9941 | 89.35        | 6.44      |
|             | T        | 89.1           | P4mm        | 3.9781 | 3.9781 | 4.0008 | 90           |           |
| $x=0.015$   | R        | 17.5           | R3m         | 3.9922 | 3.9922 | 3.9922 | 89.63        | 7.56      |
|             | T        | 82.5           | P4mm        | 3.9787 | 3.9787 | 4.0006 | 90           |           |
| $x=0.02$    | R        | 45.9           | R3m         | 3.9916 | 3.9916 | 3.9916 | 89.79        | 7.64      |
|             | T        | 55.1           | P4mm        | 3.9789 | 3.9789 | 4.0004 | 90           |           |
| $x=0.025$   | R        | 50.9           | R3m         | 3.9910 | 3.9910 | 3.9910 | 89.87        | 8.36      |
|             | T        | 49.1           | P4mm        | 3.9803 | 3.9803 | 4.0003 | 90           |           |
| $x=0.03$    | R        | 53.3           | R3m         | 3.9892 | 3.9892 | 3.9892 | 89.93        | 8.40      |
|             | T        | 46.7           | P4mm        | 3.9811 | 3.9811 | 3.9982 | 90           |           |

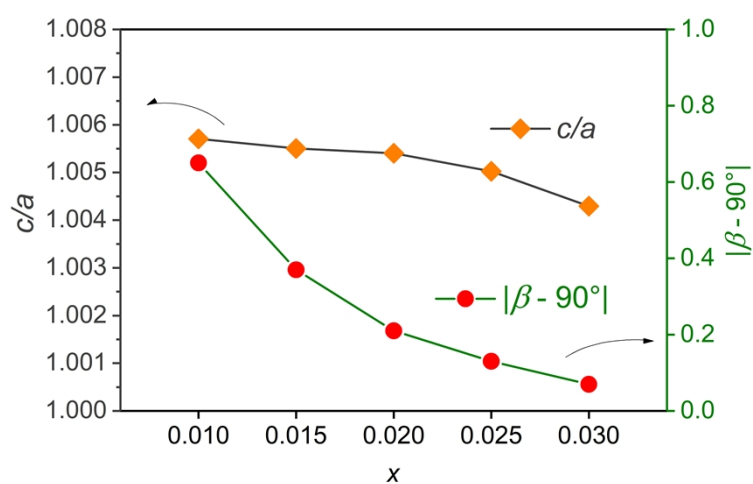

**Figure S2.** the  $c/a$  and  $|\beta - 90^\circ|$  as a function of  $x$ .
